# Supplementary material for: Glucosamine-induced growth of highly distributed TiO2 nanoparticles on graphene nanosheets as high-performance photocatalysts
Source: Royal Society of Chemistry journal article supplement (doi:10.1039/c6ra15028d), 2016-01-01
Supplement: c6ra15028d1.pdf [file c6ra15028d1.pdf]

## Supporting Information

### **Glucosamine-induced growth of highly distributed TiO<sub>2</sub> nanoparticles on graphene nanosheets as high-performance photocatalysts**

Lanbing Gu,<sup>a</sup> Haijiao Zhang,<sup>\*a</sup> Zheng Jiao,<sup>a</sup> Minjie Li,<sup>c</sup> Minghong Wu,<sup>a</sup> and Yong Lei<sup>\*b</sup>

*<sup>a</sup>Institute of Nanochemistry and Nanobiology, School of Environmental and Chemical Engineering, Shanghai University, Shanghai 200444, P. R. China*

*<sup>b</sup>Institute of Physics & IMN MacroNano, Ilmenau University of Technology, Ilmenau 98693, Germany*

*<sup>c</sup>Department of Chemistry, College of Science, Shanghai University, Shanghai 200444, P. R. China*

\*Corresponding author:

E-mail: [hjzhang128@shu.edu.cn](mailto:hjzhang128@shu.edu.cn), [yong.lei@tu-ilmenau.de](mailto:yong.lei@tu-ilmenau.de)

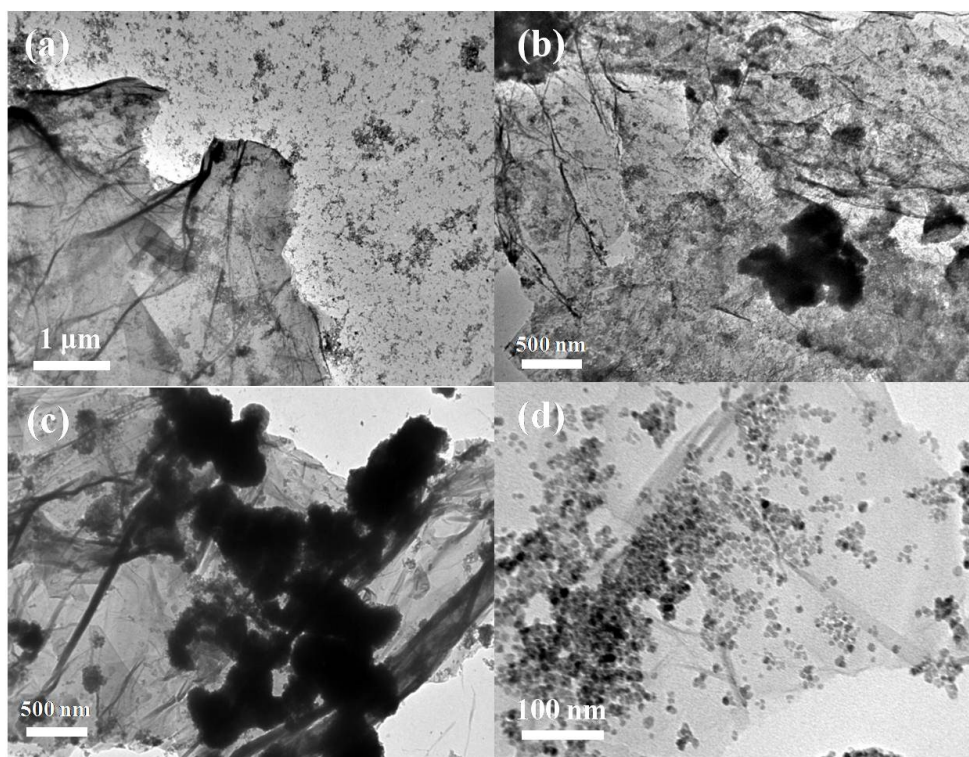

**Fig. S1** TEM images of (a) without glucosamine, (b) glucose instead of glucosamine, (c) without TPAOH, and (d) equal molar of NaOH instead of TPAOH.

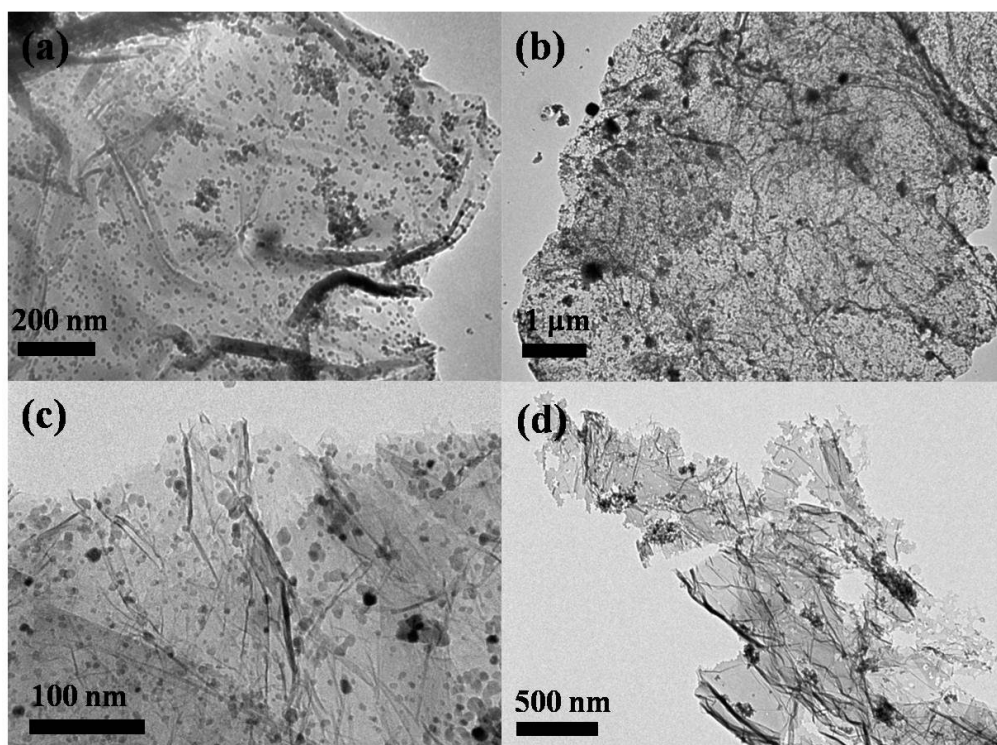

**Fig. S2** TEM images of (a) TiO<sub>2</sub>@graphene-400, (b) TiO<sub>2</sub>@graphene-500, (c)TiO<sub>2</sub>@graphene-600, and (d) TiO<sub>2</sub>@graphene-800.

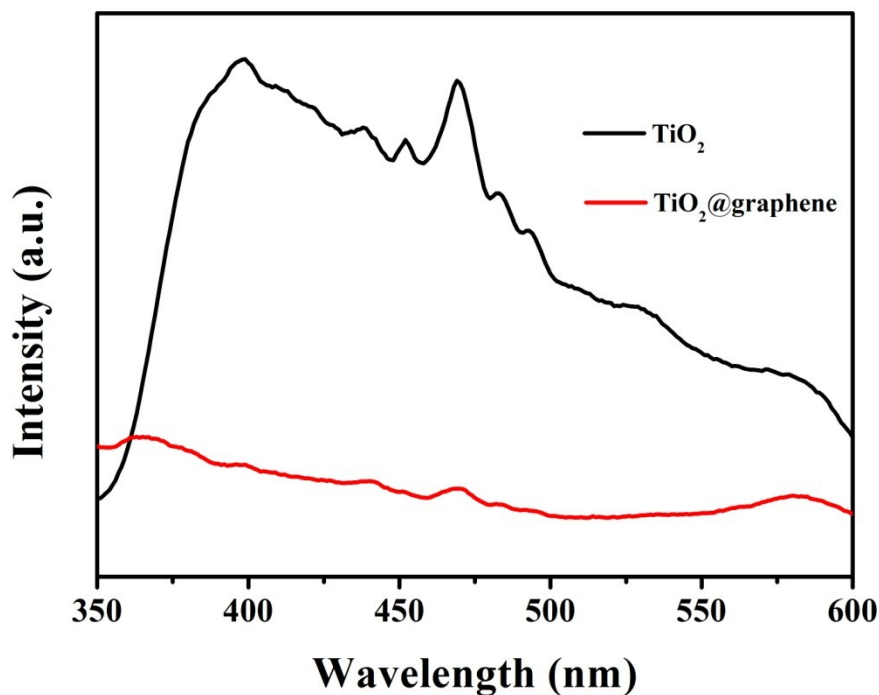

Fig. S3 Photoluminescence spectra of TiO<sub>2</sub>@graphene-700 and TiO<sub>2</sub> products.

Fig. S3 shows Photoluminescence (PL) spectra of TiO<sub>2</sub>@graphene-700 and TiO<sub>2</sub> products. Compared with the pure TiO<sub>2</sub> nanoparticles, once graphene is induced the composite, the peak intensity of the PL spectrum drastically decreases. Since PL emission results from the recombination of free carriers, the decrease of the intensity indicates that the recombination of photo induced electrons and holes has been suppressed in our TiO<sub>2</sub>@graphene product. The result is in agreement with the previous reports.<sup>1,2</sup>

1. C. Y. Hu, F. Chen, T. W. Lu, C. J. Lian, S. Z. Zheng, Q. H. Hu, S. W. Duo, R. B. Zhang. Water-phase strategy for synthesis of TiO<sub>2</sub>-graphene composites with tunable structure for high performance photocatalysts. *Appl. Surf. Sci.* 2014, 317, 648-656.
2. N. Ma, Y. W. Qiu, Y. C. Zhang, H. Y. Liu, Y. N. Yang, J. W. Wang, X. Y Li, C. Cui. Reduced graphene oxide enwrapped pinecone-like Ag<sub>3</sub>PO<sub>4</sub>/TiO<sub>2</sub> composites with enhanced photocatalytic activity and stability under visible light. *J. Alloys .Compounds.* 2015, 648, 818-825.
